# Supplementary material for: A highly efficient bifunctional heterogeneous catalyst for morphological control of discharged products in Na–air batteries
Source: Royal Society of Chemistry journal article supplement (doi:10.1039/c6cc09348e), 2017-01-01
Supplement: c6cc09348e1.pdf [file c6cc09348e1.pdf]

## **Supporting Information**

# **Highly Efficient Bifunctional Heterogeneous Catalyst for Morphological Control of Discharged Products in Na-air Battery**

Wen-Wen Yin, Zheng-Wen Fu

*Shanghai Key Laboratory of Molecular Catalysts and Innovative Materials, Department of  
Chemistry & Laser Chemistry Institute, Fudan University, Shanghai, 200433, P.R. China*

## **S1 Experimental**

### ***Synthesis of $\text{Co}_3\text{O}_4$ nanowires***

Pure carbon cloth supported- $\text{Co}_3\text{O}_4$  was prepared via a template-free growth method. In a typical experiment, after degreased with acetone, the carbon cloth ( $3 \times 4 \text{ cm}^2$ ) was then rinsed with deionized water and absolute ethanol for 30 min respectively. Then the pure carbon cloth was placed standing against the wall of the Teflon-lined autoclave (100 ml).

$\text{Co}_3\text{O}_4$  nanowires were directly deposited on the carbon cloth by a solvothermal method. In a typical synthesis, 0.7485g  $\text{Co}(\text{NO}_3)_2 \cdot 6\text{H}_2\text{O}$ , 0.0635g  $\text{NH}_4\text{F}$  and 0.2574g  $\text{CO}(\text{NH}_2)_2$  were dissolved into 60ml deionized water under vigorous magnetic stirring. The pink solution was then transferred into a Teflon-lined stainless autoclave for reaction. The autoclave was sealed and maintained at  $120^\circ\text{C}$  for 5.5h. After cooling down to room temperature, the product was collected, washed, vacuum dried and then annealed at  $250^\circ\text{C}$  for 3h.

### ***Electrochemical measurements and Physical characterization***

The assembly of the cell has been described in detail in our recent work [22]. 0.05M  $\text{Fe}(\text{C}_5\text{H}_5)_2$  in 1M  $\text{NaClO}_4$ /1,2-dimethoxyethane (DME) was used as the electrolyte. Charge-discharge measurements were performed at room temperature with a Land BT 1-40 battery test system. Field-emission scanning electron microscopy (FESEM, Cambridge S-360) was employed to study the morphology of the air cathodes. Field-emission transmission electron microscopy (FETEM) and selected-area

electron diffraction measurements (SAED) were carried out in a 200 kV side entry JEOL 2010 TEM. All discharge/charge capacities were calculated based on the weight of  $\text{Co}_3\text{O}_4$  nanowires ( $0.5 \text{ mg cm}^{-2}$ ), which was examined by electrobalance (BP211D, Sartorius).

**Table S1.** Cyclic performance of Na-air batteries reported recently

| Battery System    | Discharge Product                                 | Air Electrode                     | Discharge Capacity / mAh g <sup>-1</sup> | Current Density / mA g <sup>-1</sup> | Cycle Number | Reference |
|-------------------|---------------------------------------------------|-----------------------------------|------------------------------------------|--------------------------------------|--------------|-----------|
| Na-O <sub>2</sub> | Na <sub>2</sub> O <sub>2</sub>                    | DLC                               | 1050-2100                                | 1/10 C                               | 20           | 1         |
| Na-O <sub>2</sub> | Na <sub>2</sub> O <sub>2</sub>                    | GNS                               | 1150                                     | 75                                   | 3            | 2         |
| Na-O <sub>2</sub> | Na <sub>2</sub> O <sub>2</sub>                    | NGNS                              | 1150                                     | 75                                   | 3            | 2         |
| Na-O <sub>2</sub> | Na <sub>2</sub> O <sub>2</sub>                    | GNS                               | 1200                                     | 300                                  | 10           | 3         |
| Na-O <sub>2</sub> | Na <sub>2</sub> O <sub>2</sub>                    | CF <sub>x</sub>                   | 1000                                     | 200                                  | 6            | 4         |
| Na-O <sub>2</sub> | Na <sub>2</sub> O <sub>2</sub> ·2H <sub>2</sub> O | CNT                               | 1000                                     | 500                                  | 7            | 5         |
| Na-O <sub>2</sub> | Na <sub>2</sub> O <sub>2</sub>                    | NiCo <sub>2</sub> O <sub>4</sub>  | 1000                                     | 50                                   | 10           | 6         |
| Na-O <sub>2</sub> | NaO <sub>2</sub>                                  | GDL                               | 64                                       | 200 μAcm <sup>-2</sup>               | 80           | 7         |
| Na-O <sub>2</sub> | NaO <sub>2</sub>                                  | Ketjenblack                       | 1666                                     | 200 μA cm <sup>-2</sup>              | 60           | 7         |
| Na-O <sub>2</sub> | NaO <sub>2</sub>                                  | VACNT                             | 750                                      | 67                                   | 130-140      | 8         |
| Na-O <sub>2</sub> | Na <sub>2</sub> O <sub>2</sub>                    | CNT+ NaI                          | 1000                                     | 500                                  | 150          | 9         |
| Na-O <sub>2</sub> | Na <sub>2</sub> O <sub>2</sub>                    | CNT + ferrocene                   | 1000                                     | 500                                  | 230          | 10        |
| Na-O <sub>2</sub> | NaO <sub>2</sub>                                  | GDL-MWCNT                         | 500                                      | 100                                  | 60           | 11        |
| Na-O <sub>2</sub> | Na <sub>2</sub> CO <sub>3</sub>                   | OMC                               | 500                                      | 100                                  | 20           | 12        |
| Na-O <sub>2</sub> | Na <sub>2</sub> O <sub>2</sub> ·2H <sub>2</sub> O | B-OLC                             | 1000                                     | 0.3mA/cm <sup>2</sup>                | 120          | 13        |
| Na-O <sub>2</sub> | Na <sub>2</sub> O <sub>2</sub>                    | 3D N-GA                           | 500                                      | 100                                  | 100          | 14        |
| Na-O <sub>2</sub> | NaO <sub>2</sub> Na <sub>2</sub> O <sub>2</sub>   | NC-750                            | 500                                      | 200                                  | 66           | 15        |
| Na-O <sub>2</sub> | Na <sub>2</sub> O <sub>2</sub>                    | Co <sub>3</sub> O <sub>4</sub> /C | 1000                                     | 500                                  | 570          | This work |

## Reference

- [1] Q. Sun, Y. Yang, Z. W. Fu, Electrochem Commun. 16 (2012) 22-25.
- [2] Y. L. Li, H. Yadegari, X. Li, M. N. Banis, R. Li, X. Sun, Chem. Commun. 49 (2013) 11731-11733.
- [3] W. Liu, Q. Sun, Y. Yang, J. Y. Xie, Z. W. Fu, Chem. Commun. 49 (2013) 1951-1953.
- [4] W. Liu, H. Li, J.Y. Xie, and Z. W. Fu, ACS Appl. Mater. Interfaces. 6(2014) 2209-2212.

- [5] Z. L. Jian, Y. Chen, F. J. Li, T. Zhang, C. Liu, H. S. Zhou, *J. Power Sources*. 251 (2014) 466-469.
- [6] W.M. Liu, W.W. Yin, F. Ding, L. Sang, Z. W. Fu, *Electrochem. Commun.* 45 (2014) 87-90.
- [7] C. L. Bender, P. Hartmann, M. Vracar, P. Adelhelm, and J. Janek, *Adv. Energy Mater.* 4 (2014) 1301863.
- [8] N. Zhao, C.L. Li and X. X. Guo, *Phys. Chem. Chem. Phys.* 16 (2014) 15646—15652.
- [9] W. W. Yin, Z. Shadike, Y. Yang, F. Ding, L. Sang, H. Li and Z. W. Fu, *Chem. Commun.* 51(2015) 2324-2327.
- [10] W. W. Yin, J. L. Yue, M. H. Cao, W. Liu, J. J. Ding, F. Ding, L. Sang and Z. W. Fu, *J. Mater. Chem. A*. 3 (2015) 19027 –19032.
- [11] G. A. Elia, I. Hasa, J. Hassoun, *Electrochimica Acta*. 191 (2016) 516–520.
- [12] W. J. Kwak, Z. H. Chen, C. S. Yoon, J. K. Lee, K. Amine, Y. K. Sun, *Nano Energy* 12 (2015) 123-130.
- [13] C. Z. Shu, Y. M. Lin, B. S. Zhang, S. B. A. Hamid and D. S. Su, *J. Mater. Chem. A*. 4 (2016) 6610-6619.
- [14] S. P. Zhang, Z. Y. Wen, J. Jin, T. Zhang, J. H. Yang and C. H. Chen, *J. Mater. Chem. A*. 4 (2016) 7238–7244.
- [15] J. L. Ma and X. B. Zhang, *J. Mater. Chem. A*. 4 (2016) 10008–10013.

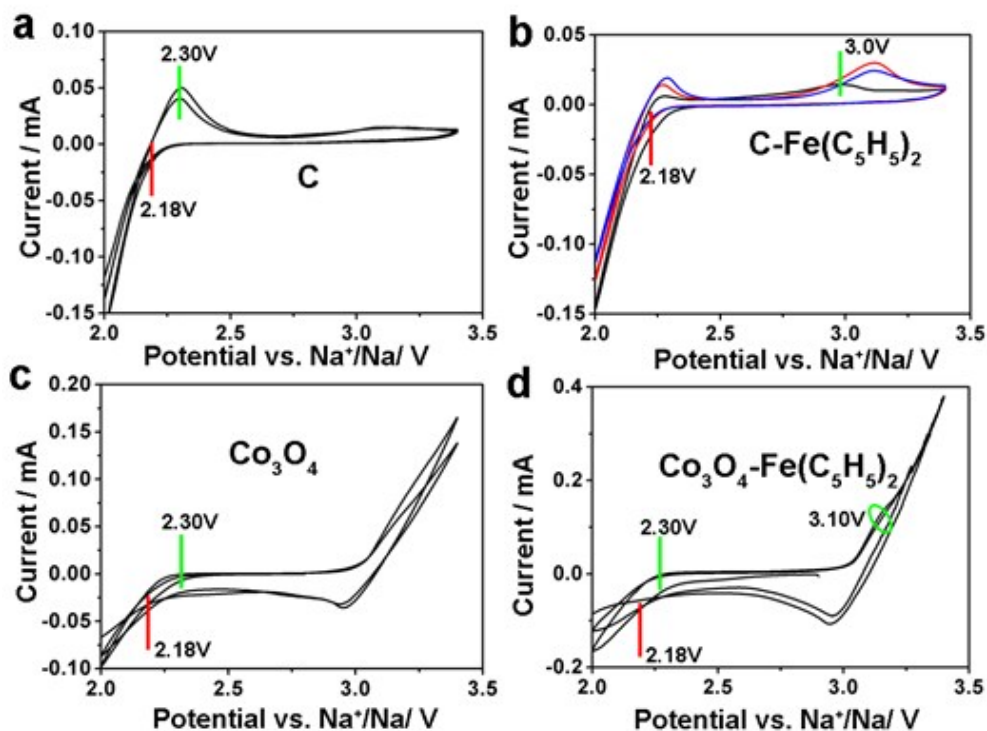

Figure S1. The CV curves of SABs with (a) carbon air electrode in pristine electrolyte (b) carbon air electrode in ferrocene-containing electrolyte (c) Co<sub>3</sub>O<sub>4</sub> NWs/C air electrode in pristine electrolyte (d) Co<sub>3</sub>O<sub>4</sub> NWs/C air electrode in the ferrocene-containing electrolyte between 2.0 and 3.4 V at a scanning rate of 0.1 mV/s.

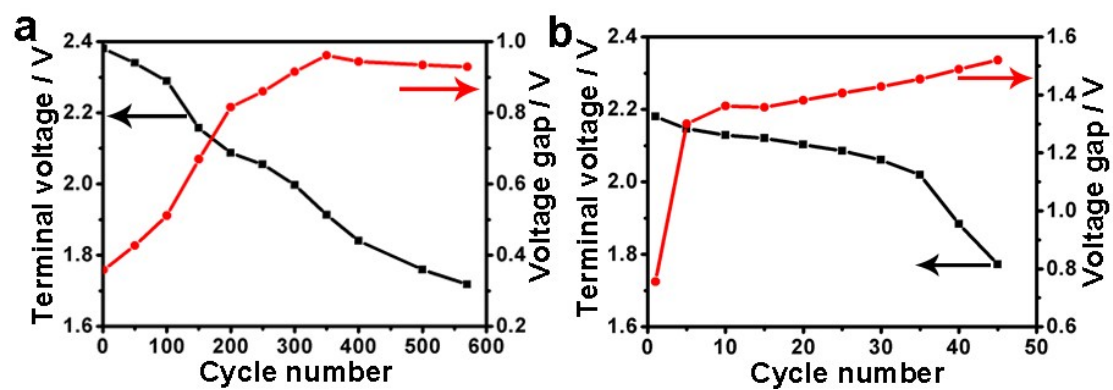

Figure S2. Terminal discharge voltage (the black line) and voltage gap (the red line)  $\text{Co}_3\text{O}_4$  NWs/C air electrodes using (a) 0.05 M ferrocene-containing electrolyte; (b) pristine electrolyte during galvanostatic discharge and charge at  $500 \text{ mA h g}^{-1}$  as a function of cycle number.

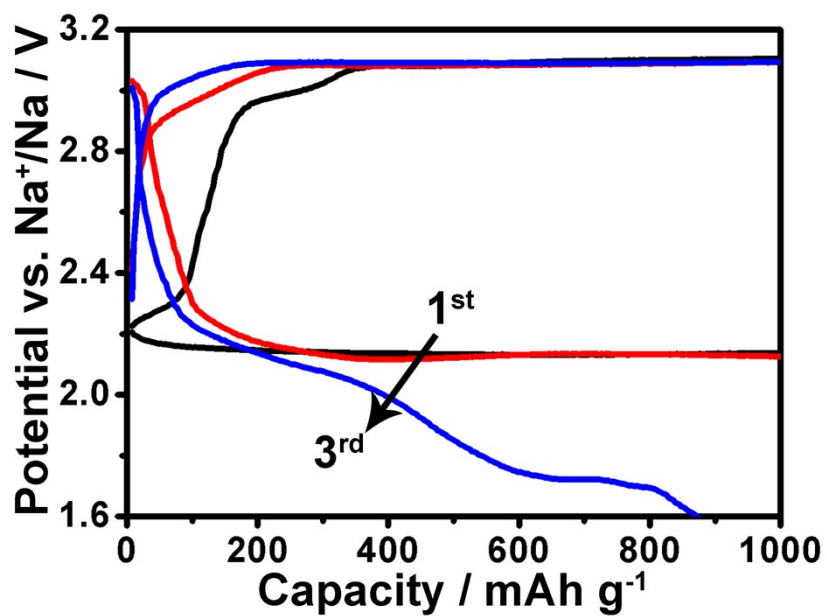

Figure S3. Cyclic performance of pure C air electrodes using 0.05 M ferrocene-containing electrolyte (the capacity was limited to 1000 mAh g<sup>-1</sup>) at the current density of 500 mA g<sup>-1</sup>.



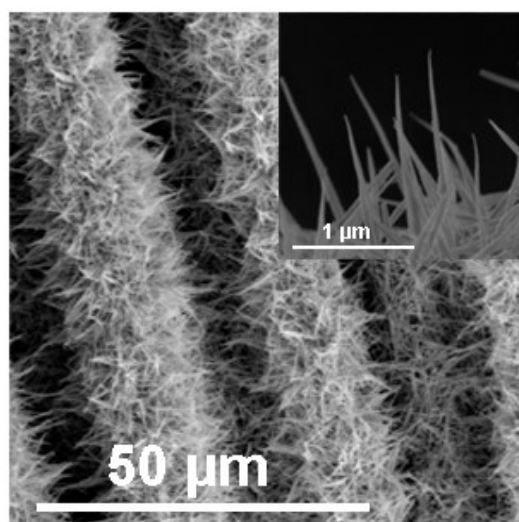

Figure S4. SEM images of Co<sub>3</sub>O<sub>4</sub> nanowires/C

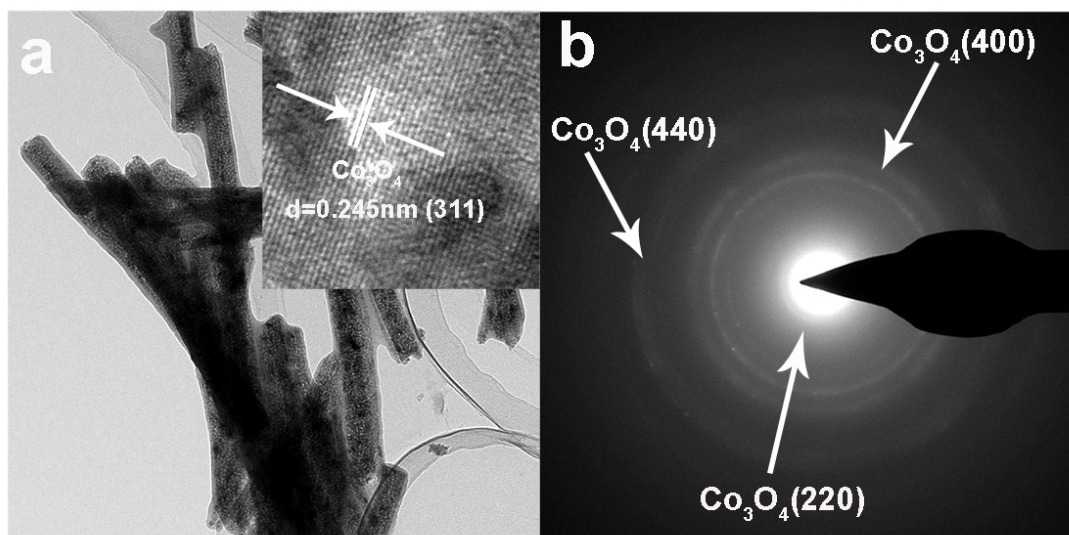

Figure S5. High resolution TEM images of the  $\text{Co}_3\text{O}_4$  nanowires/C in the ferrocene containing electrolyte (a) after charging to 3.3 V at the current density of  $500\text{ mA g}^{-1}$  and (b) corresponding SAED patterns.

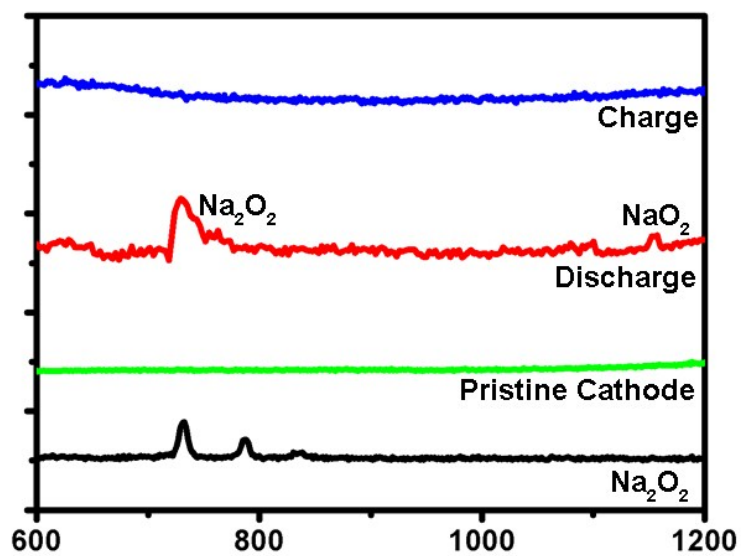

Figure S6. Raman spectra of the pristine cathode and electrodes after being discharged to 1.8V and charged to 3.3V in ferrocene-containing electrolyte, respectively.

To test the Raman spectra of discharge product, we use the carbon cathode instead of Co<sub>3</sub>O<sub>4</sub> NWs/C cathode.
